# Supplementary material for: Uptake of Health Care Services by Refugees: Modelling a Country Response to a Western Balkan Refugee Crisis
Source: MDPI journal article supplement (doi:10.3390/healthcare8040560), 2020-12-14
Supplement: s1 [file s1]

### Supplemental file 1: ARIMA with time series modeling outliers

| ARIMA time series Model                              | Political decisions                                                                                                                                                                                                                                                                                                                                                             | Outliers                        |                                                                          |           |           |        |       |
|------------------------------------------------------|---------------------------------------------------------------------------------------------------------------------------------------------------------------------------------------------------------------------------------------------------------------------------------------------------------------------------------------------------------------------------------|---------------------------------|--------------------------------------------------------------------------|-----------|-----------|--------|-------|
|                                                      |                                                                                                                                                                                                                                                                                                                                                                                 | Week                            | Type                                                                     | Estimate  | SE        | t      | Sig.  |
| A. Refugees' arrivals in Serbia, n                   | <b>25 Oct 2015 (III period - Stability and Order):</b> Meeting on the Western Balkans Migration Route -17 point action plan;                                                                                                                                                                                                                                                    | <b>11</b> (9-11 Nov 2015)       | Additive (spike/shock, sudden change)                                    | 19713.998 |           |        | 0.000 |
|                                                      | <b>14 Sept 2015 (II period - Chaos and Panic):</b> Extraordinary Justice and Home Affairs Council.<br><b>22 Sept 2015:</b> Extraordinary Justice and Home Affairs Council;<br><b>23 Sept 2015:</b> Extraordinary EU Council meeting                                                                                                                                             | <b>6</b> (5 - 11 Oct 2015)      | Innovational (slow change in the process continues forward through time) | 78305.349 | 13235.784 | 5.916  | 0.000 |
| B. Refugee's arrivals to the EU countries, n         | <b>8.10.2015 (III period - Stability and Order):</b> High-level Conference on the Eastern Mediterranean - Western Balkans route;                                                                                                                                                                                                                                                | (19 - 25 Oct 2015)              | Transient Magnitude (spike/shock that gradually disappear)               | 48681.588 | 12621.248 | 3.857  | 0.001 |
|                                                      | <b>15.10.2015 (III period - Stability and Order):</b> European Council - EU leaders agreement                                                                                                                                                                                                                                                                                   |                                 | Decay factor                                                             | 0.793     | 0.213     | 3.731  | 0.001 |
|                                                      | <b>25 Oct 2015 (III period - Stability and Order):</b> Meeting on the Western Balkans Migration Route – 17 point action plan;                                                                                                                                                                                                                                                   | <b>11</b> (9-11 Nov 2015)       | Additive                                                                 | 45508.943 | 9228.553  | 4.931  | 0.000 |
|                                                      | <b>Jan 2016 (IV period – Restrictions and Confusion):</b> Austria and Germany cap the refugee influx, plan repatriation and deportation of criminal refugees; Austria stricter border controls and new fences along the Slovenian border;<br><b>1 – 8 Feb 2016 (IV period – Restrictions and Confusion):</b> Macedonia shuts the borders, constructs a second fence with Greece | <b>24</b> (8 – 14 Feb 2015)     | Additive                                                                 | 29865.777 | 9177.509  | 3.254  | 0.004 |
| C. Refugees registered in healthcare institutions, n | <b>May (I period – Prior to August):</b> A European Agenda on Migration;                                                                                                                                                                                                                                                                                                        | <b>1</b> (1 June – 6 Sept 2015) | Transient Magnitude                                                      | -3123.573 | 577.752   | -5.406 | 0.000 |
|                                                      | <b>Sept (II period - Chaos and Panic):</b> European Centre of Diseases Control issued advice on the public health needs of migrants across Europe Union.                                                                                                                                                                                                                        |                                 | Decay factor                                                             | 0.768     | 0.079     | 9.758  | 0.000 |

|                                                       |                                                                                                                                                                                                                                                            |                                |                     |           |         |        |       |
|-------------------------------------------------------|------------------------------------------------------------------------------------------------------------------------------------------------------------------------------------------------------------------------------------------------------------|--------------------------------|---------------------|-----------|---------|--------|-------|
|                                                       | <b>25 Oct 2015 (III period - Stability and Order):</b> Meeting on the Western Balkans Migration Route – 17 point action plan;                                                                                                                              | <b>9</b> (26 Oct - 1 Nov 2015) | Additive            | 7603.479  | 728.273 | 10.440 | 0.000 |
|                                                       |                                                                                                                                                                                                                                                            | <b>11</b> (9 - 11 Nov 2015)    | Additive            | 5056.424  | 718.488 | 7.038  | 0.000 |
|                                                       | <b>15 Feb 2016 (V period - Quotas and tensions):</b> Visegrad group closure of the Balkan route, Austria expands the list of safe countries of origin;                                                                                                     | <b>25</b> (15 – 21 Feb 2015)   | Local Trend         | -283.710  | 72.714  | -3.902 | 0.001 |
|                                                       | <b>19 Feb 2016:</b> Austria and Germany cap number of asylum applications per day + persons allowed to transit per day;<br><b>21 Feb 2016:</b> The North Macedonia passes new restrictions, Serbia, Croatia and Slovenia reduce their numbers of refugees; |                                |                     |           |         |        |       |
| D. Medical conditions of refugees in Serbia, n        | <b>25 Oct 2015 (III period - Stability and Order):</b> Meeting on the Western Balkans Migration Route – 17 point action plan;                                                                                                                              | <b>9</b> (26 Oct – 1 Nov 2015) | Transient Magnitude | 9034.676  | 768.194 | 11.761 | 0.000 |
|                                                       |                                                                                                                                                                                                                                                            |                                | Decay factor        | 2624.214  | 483.829 | 5.424  | 0.000 |
|                                                       |                                                                                                                                                                                                                                                            | <b>10</b> (2 - 8 Nov 2015)     | Additive            | 0.941     | 0.020   | 46.059 | 0.000 |
|                                                       |                                                                                                                                                                                                                                                            | <b>11</b> (9 - 11 Nov 2015)    | Additive            | 3755.860  | 813.743 | 4.616  | 0.000 |
| E. Health care services used by refugees in Serbia, n | <b>May (I period – Prior to August):</b> A European Agenda on Migration;                                                                                                                                                                                   | <b>1</b> (1 June – 6 Sep 2015) | Additive            | -2610.845 | 773.766 | -3.374 | 0.002 |
|                                                       | <b>Sept:</b> European Centre of Diseases Control issued advice on the public health needs of migrants across Europe Union.                                                                                                                                 |                                |                     |           |         |        |       |
|                                                       | <b>25 Oct 2015 (III period - Stability and Order):</b> Meeting on the Western Balkans Migration Route – 17 point action plan;<br>Personnel Health Record for migrants is launched;                                                                         | <b>9</b> (26 Oct - 1 Nov 2015) | Transient Magnitude | 0.707     | 0.138   | 5.143  | 0.000 |
|                                                       |                                                                                                                                                                                                                                                            |                                | Decay factor        | 7750.271  | 904.878 | 8.565  | 0.000 |
|                                                       |                                                                                                                                                                                                                                                            | <b>11</b> (9 - 11 Nov 2015)    | Additive            | 5246.617  | 896.648 | 5.851  | 0.000 |
